# Supplementary material
Source: PubMed Central journal article supplement (PMC6092614)
Supplement: EMBJ-37-e98724-s001.pdf [file EMBJ-37-e98724-s001.pdf]

## Expanded View Figures

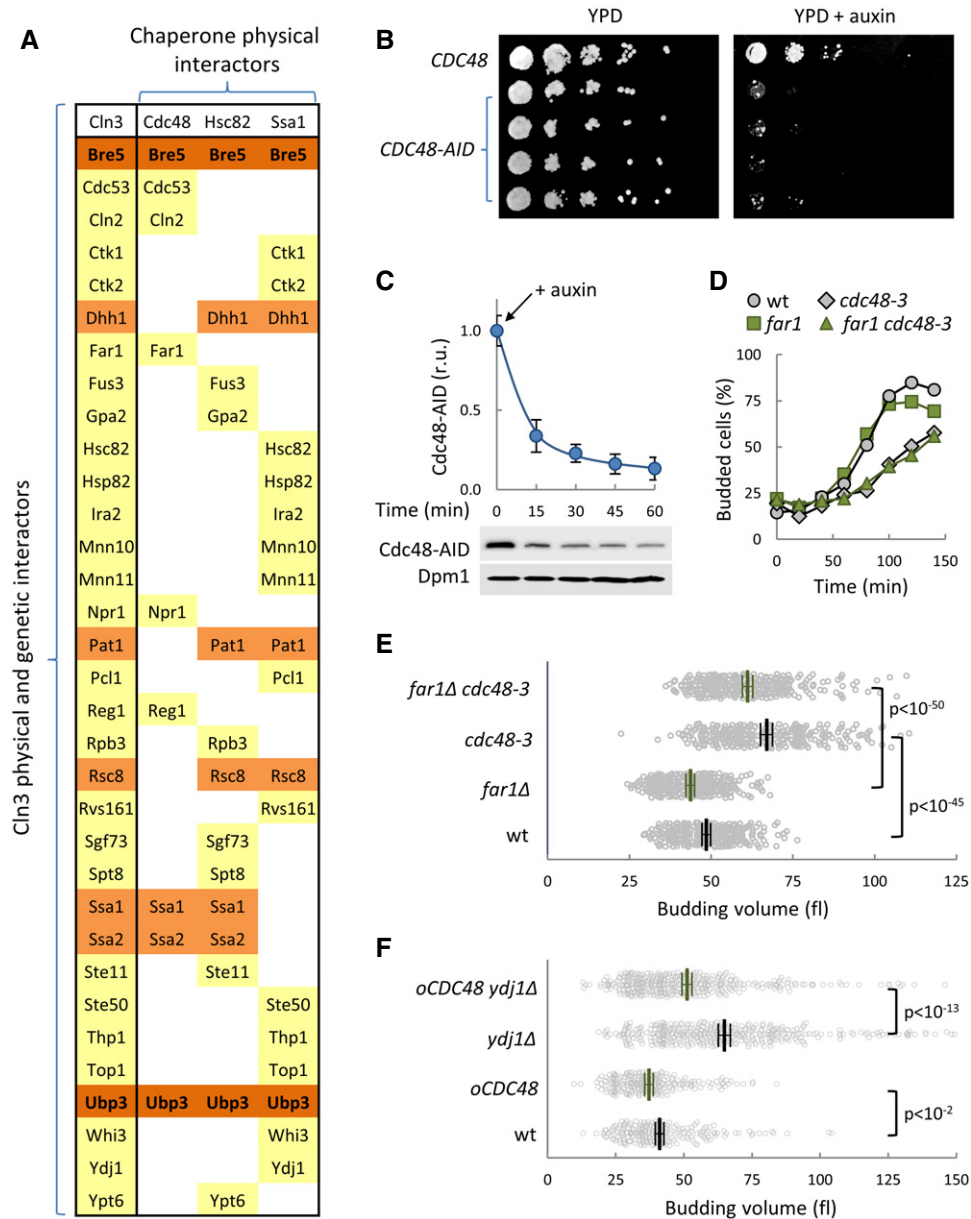

**Figure EV1. Chaperone target proteins in the Cln3 interactome and genetic interactions of *CDC48* in cell cycle entry and size determination.**

- A Physical interactors of Ssa1, Hsc82, and Cdc48 that display genetic or physical interactions to Cln3 (SGD Project. <http://www.yeastgenome.org/07/07/2017>).
- B Serial dilutions of four independent isolates expressing *CDC48-AID* or *CDC48* were plated and incubated for growth at 30°C for 2 days in the presence or absence of auxin.
- C *Cdc48-AID* levels in cells at different times from auxin addition. Dpm1 served as loading control and quantified levels with the confidence limits ( $\alpha = 0.05$ ) for the mean are plotted at the top.
- D Budding frequencies of newborn daughter cells with the indicated genotypes during growth at the restrictive temperature (37°C).
- E Individual volumes at budding of cells with the indicated genotypes. Mean values ( $N > 200$ , thick lines), confidence limits ( $\alpha = 0.05$ , thin lines) for the mean and  $P$  values obtained from  $t$ -tests are also shown.
- F Individual volumes at budding of wild-type and *ydj1Δ* cells overexpressing *Cdc48* (*oCDC48*) or not. Mean values ( $N > 200$ , thick lines), confidence limits ( $\alpha = 0.05$ , thin lines) for the mean, and  $P$  values obtained from  $t$ -tests are also shown.

Source data are available online for this figure.

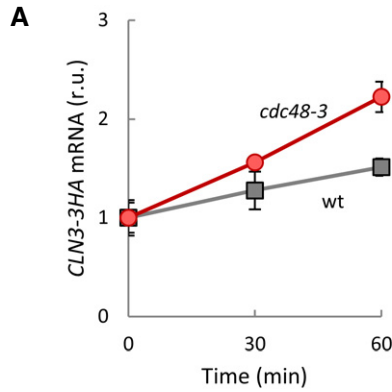

**Figure EV2. Cdc48 regulates Cln3 levels at a post-translational level.**

A *CLN3-3HA* mRNA levels in wild-type (wt) and *cdc48-3* cells at the indicated times after transferring cells to the restrictive temperature (37°C). Values were made relative to *HXK1* mRNA and time 0. Mean values ( $N = 3$ ) and confidence limits ( $\alpha = 0.05$ ) for the mean are shown.

B Cln3-1-3HA stability in Cdc48-deficient cells. After being transferred to the restrictive temperature (37°C) for 30 min, wild-type (wt) and *cdc48-3* cells expressing the hyperstable *CLN3-1-3HA* allele at endogenous levels were added cycloheximide and collected at the indicated times to determine protein levels. Dpm1 is shown as a loading control.

Source data are available online for this figure.

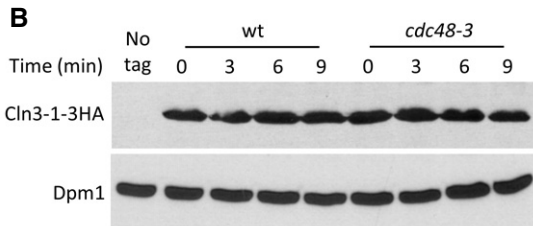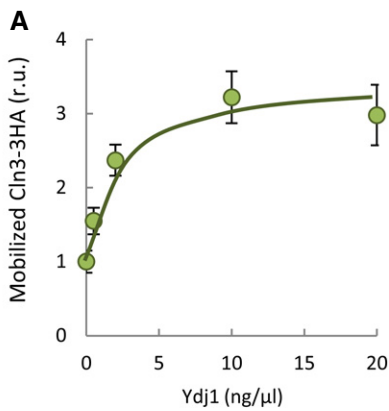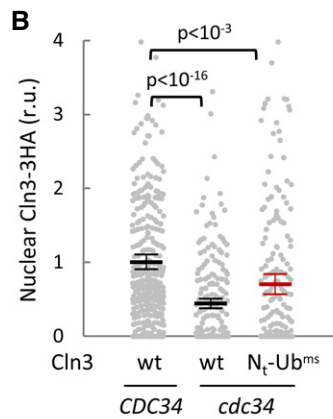

**Figure EV3. Mobilization, nuclear accumulation, and interaction of Cln3 with Cdc48.**

A Cell extracts from *ydj1Δ CLN3-3HA* cells were incubated for 30 min at 27°C in the presence of an ATP-regeneration system and the indicated concentrations of purified Ydj1. Mobilized soluble fractions were obtained to analyze released Cln3-3HA by immunoblotting. Mean values ( $N = 3$ ) and confidence limits ( $\alpha = 0.05$ ) for the mean are shown.

B Nuclear accumulation of wild-type and  $N_t$ -Ub<sup>ms</sup> Cln3-3HA in individual wild-type *CDC34* or thermosensitive *cdc34* cells growing at the restrictive temperature was analyzed by immunofluorescence as in Fig 2E. Relative mean values ( $N = 500$ , thick horizontal lines), confidence limits ( $\alpha = 0.05$ , thin lines) for the mean and  $P$  values obtained from t-tests are also shown.

C Cell extracts (Input) and  $\alpha$ FLAG immunoprecipitates ( $\alpha$ FLAG IP) of cells expressing Cdc48-6FLAG and wild-type, all<sup>KR</sup>,  $N_t$ <sup>KR</sup>, or  $C_t$ <sup>KR</sup> Cln3-3HA proteins were analyzed by immunoblotting with either  $\alpha$ HA or  $\alpha$ FLAG antibodies. The  $\alpha$ FLAG heavy chain (IgG) band is also marked.

D Quantification of Cln3-3HA levels from immunoblots in (C). Mean values ( $N = 3$ ) and confidence limits ( $\alpha = 0.05$ ) for the mean are shown.

Source data are available online for this figure.

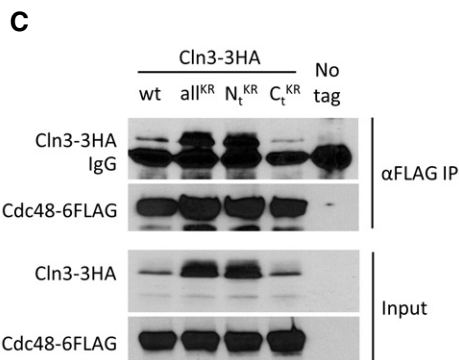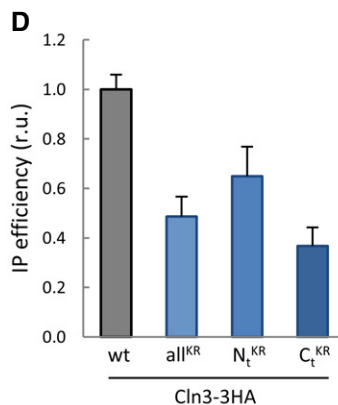

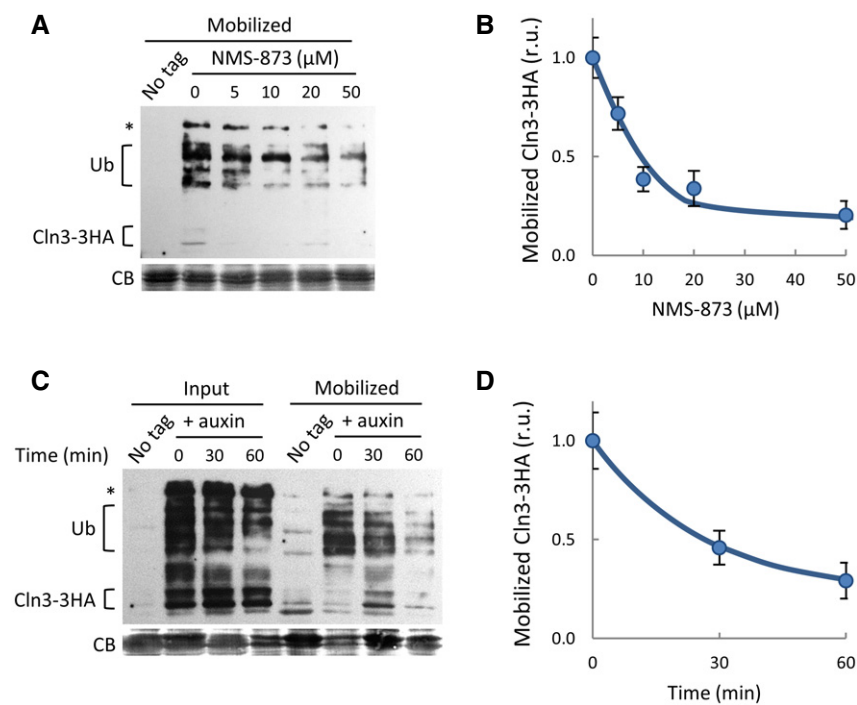

**Figure EV4. Cdc48 interacts with Cln3 and plays a key role in release from the ER.**

A Mobilized soluble fractions were obtained as in Fig 3A in the presence of NMS-873 at the indicated concentrations to analyze released Cln3-3HA by immunoblotting. High-molecular-weight species corresponding to ubiquitinated Cln3-3HA are indicated (Ub). A high-molecular-weight  $\alpha\text{HA}$  cross-reacting band is marked (\*), and a prominent Coomassie Blue (CB) band is shown as loading control.

B Quantification of mobilized Cln3-3HA as a function of NMS-873 concentration from experiments as in (A). Mean values ( $N = 3$ ) and confidence limits ( $\alpha = 0.05$ ) for the mean are shown.

C Mobilized soluble fractions were obtained as in Fig 3A with extracts from Ydj1-deficient cells expressing Cdc48-AID collected at different times after auxin addition. High-molecular-weight species corresponding to ubiquitinated Cln3-3HA are indicated (Ub). A high-molecular-weight  $\alpha\text{HA}$  cross-reacting band is marked (\*), and a prominent Coomassie Blue (CB) band is shown as loading control.

D Quantification of mobilized Cln3-3HA as a function of Cdc48-AID levels from experiments as in (C). Mean values ( $N = 3$ ) and confidence limits ( $\alpha = 0.05$ ) for the mean are shown.

Source data are available online for this figure.

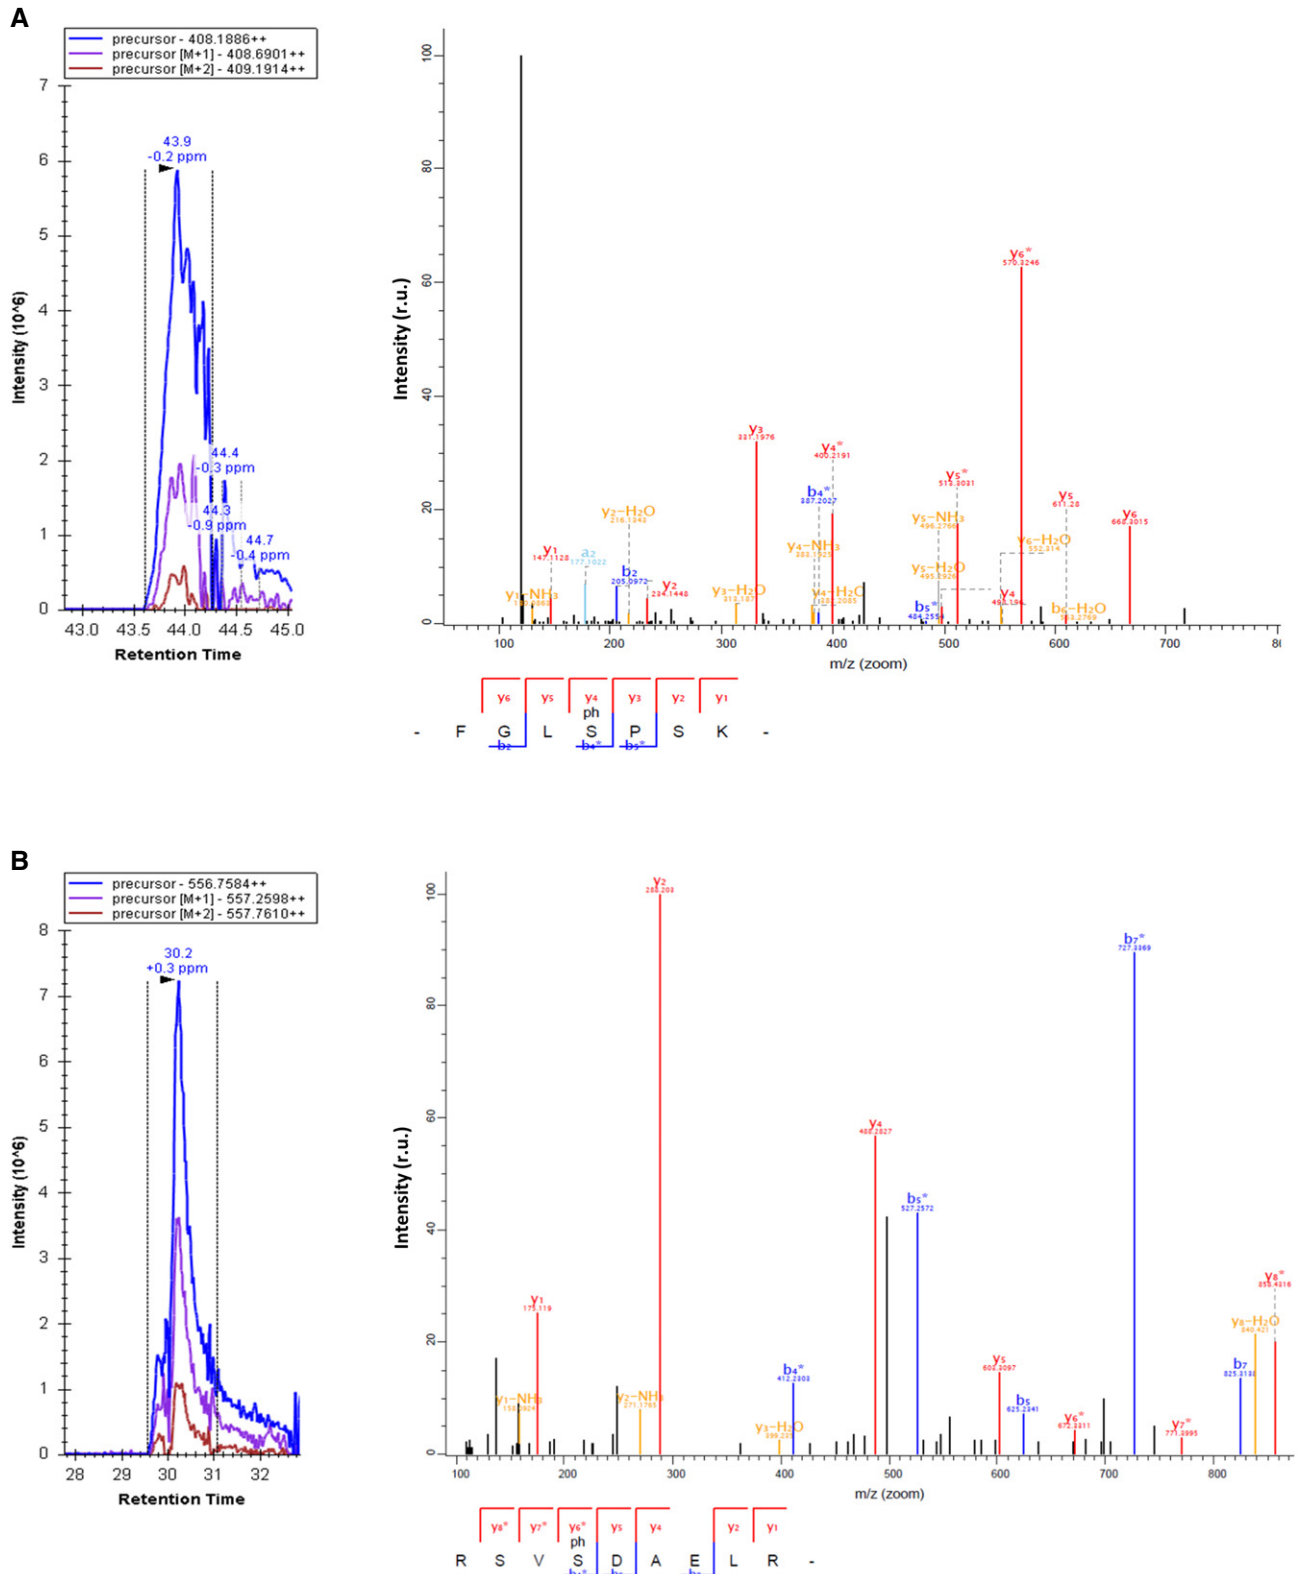

**Figure EV5. Identification of Cdc48 peptides containing pS519 and pS770 by mass spectrometry analysis.**

A, B Cycling cells expressing GST-Cdc48 at endogenous levels were used to prepare cell extracts and purify GST-Cdc48 for MS analysis. Representative ion chromatograms (left panels) and fragmentation spectra (right panels) of ions corresponding to pS519 (A) and pS770 (B) peptides are shown.

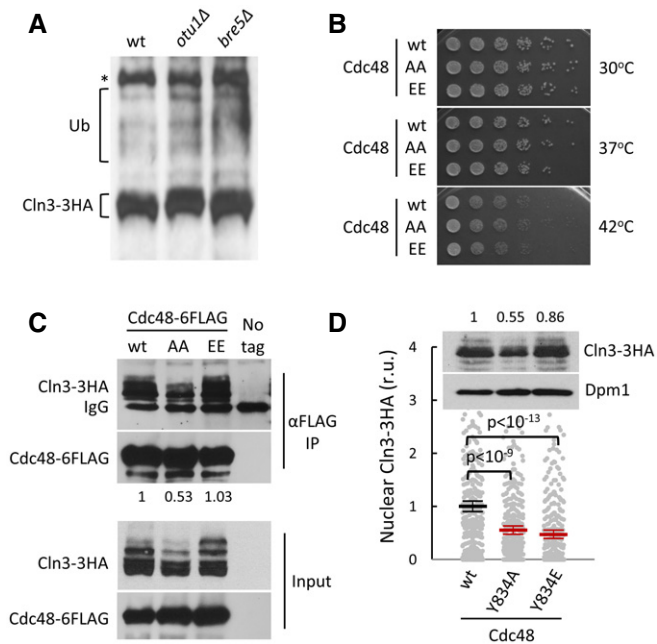**Figure EV6. Cln3 fate and Cdc48 phosphorylation mutant proteins.**

- A** Cell extracts from wild-type, *otu1Δ* and *bre5Δ* cells expressing *CLN3-3HA* were analyzed by immunoblotting. High-molecular-weight species corresponding to ubiquitinated Cln3-3HA are indicated (Ub). A high-molecular-weight  $\alpha$ HA cross-reacting band is marked (\*).
- B** Cells expressing wild-type (wt), non-phosphorylatable (AA), or phosphomimetic (EE) Cdc48 proteins at endogenous levels were diluted, spotted onto YPD plates and grown at 30, 37 or 42°C.
- C** Cell extracts (Input) and  $\alpha$ FLAG immunoprecipitates ( $\alpha$ FLAG IP) of cells expressing Cln3-3HA and wild-type (wt), non-phosphorylatable (AA), or phosphomimetic (EE) Cdc48-6FLAG proteins from the *GALI1p* promoter as in Fig 6G (same experiment) were analyzed by immunoblotting with either  $\alpha$ HA or  $\alpha$ FLAG antibodies. The  $\alpha$ FLAG heavy chain (IgG) band is also marked. Indicated numbers refer to the relative levels of Cln3-3HA in immunoprecipitated samples as quantified from image.
- D** Nuclear accumulation of Cln3-3HA in individual cells expressing wild-type (wt), tyrosine non-phosphorylatable (Y834A), or tyrosine phosphomimetic (Y834E) Cdc48 proteins at endogenous levels. Immunofluorescence analysis was performed in cycling cells as in Fig 2E. Relative mean values ( $N > 275$ , thick horizontal lines), confidence limits ( $\alpha = 0.05$ , thin lines) for the mean, and  $P$  values obtained from  $t$ -tests are also shown. An immunoblot showing overall levels of Cln3-3HA in cells from this experiment is shown at the top and relative amounts are indicated. Dpm1 was detected as loading control.

Source data are available online for this figure.

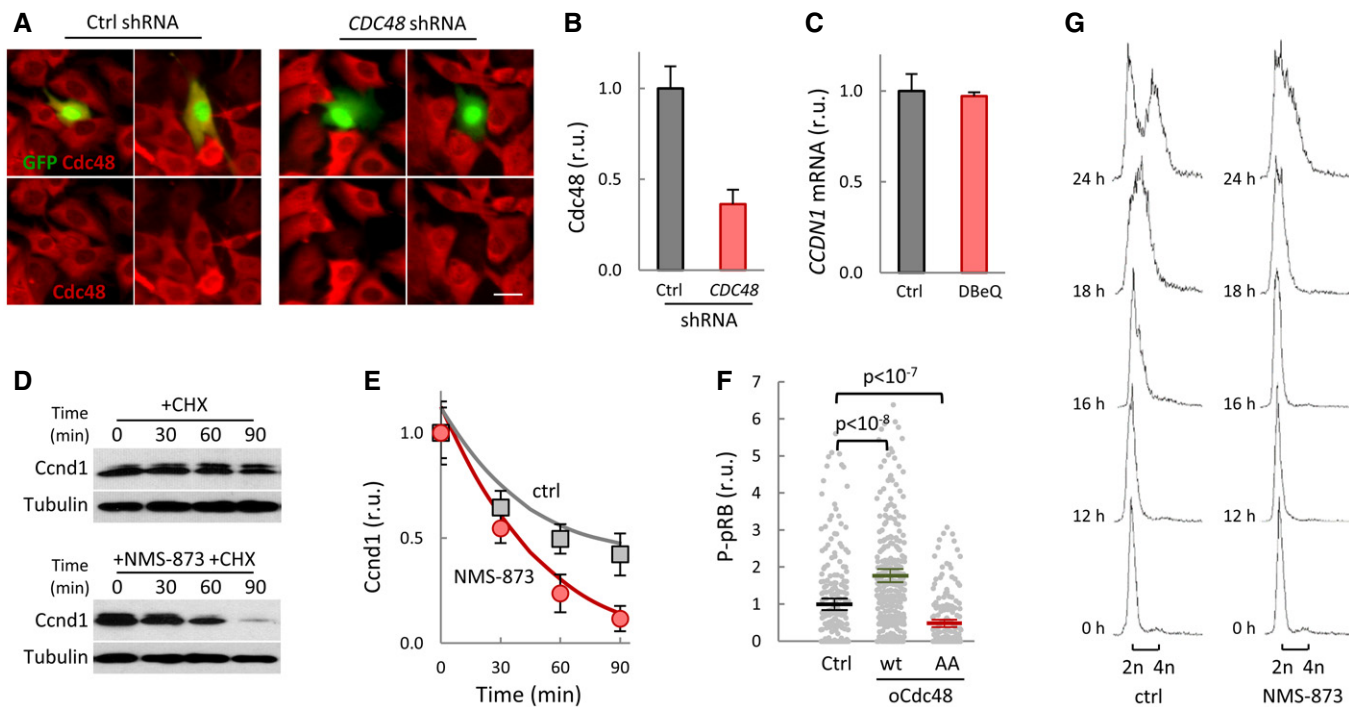

**Figure EV7. Cdc48 also controls stability and nuclear functions of cyclin D1 in mammalian cells.**

- A Immunofluorescence analysis of Cdc48 (red signal) in mouse 3T3 cells transfected with control or Cdc48 shRNAs. GFP (green) was used as a transfection reporter. Scale bar, 20  $\mu$ m.
- B Quantification of Cdc48 levels in 3T3 cells transfected with control or Cdc48 shRNAs as in (A). Values were made relative to the average obtained from control cells. Mean values ( $N > 50$ ) and confidence limits ( $\alpha = 0.05$ ) for the mean are shown.
- C *CCND1* mRNA levels in 3T3 cells in the absence (Ctrl) or presence of 10  $\mu$ M DBEq for 90 min. Values were made relative to *GAPDH* mRNA and control sample. Mean values ( $N = 3$ ) and confidence limits ( $\alpha = 0.05$ ) for the mean are shown.
- D Ccnd1 stability in 3T3 cells. After being treated with or without 2  $\mu$ M NMS-873 for 2 h, cells were added cycloheximide and collected at the indicated times to determine Ccnd1 levels. Tubulin is shown as a loading control.
- E Quantification of Ccnd1 stability in control (squares) and NMS-873 treated (circles) cells from immunoblot analysis as in (D) at the indicated times after cycloheximide addition. Mean values ( $N = 3$ ) and confidence limits ( $\alpha = 0.05$ ) for the mean are shown.
- F P-S780-pRB levels in 3T3 cells overexpressing wild-type (wt) or non-phosphorylatable (AA) Cdc48, or none as control. Values were made relative to the average obtained from control cells. Mean values ( $N > 200$ , thick horizontal lines), confidence limits ( $\alpha = 0.05$ , thin lines) for the mean, and  $P$  values obtained from  $t$ -tests are also shown.
- G Serum-starved 3T3 cells were stimulated to enter the cell cycle by the addition of 10% FCS in the presence or absence of 2  $\mu$ M NMS-873, and samples were taken at the indicated times to obtain DNA content profiles by FACS.

Source data are available online for this figure.
