# Supplementary material
Source: PubMed Central journal article supplement (PMC6092614)

**B**

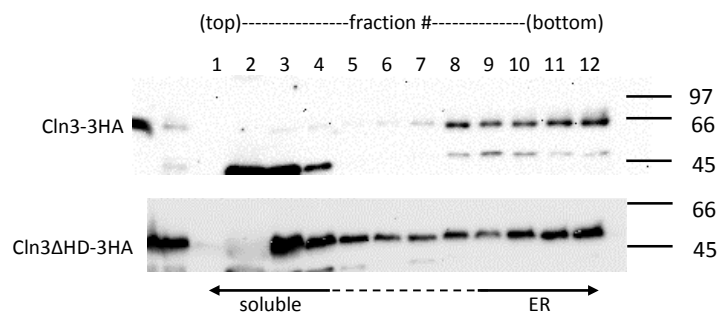

**D**

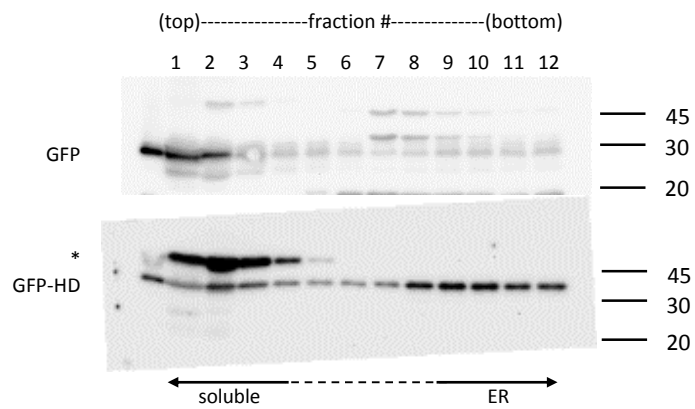

Supplement: EMBJ-37-e98724-s005.pdf [file EMBJ-37-e98724-s005.pdf]

**D**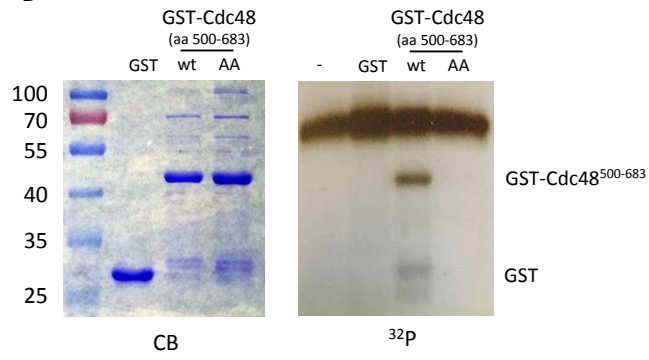**F**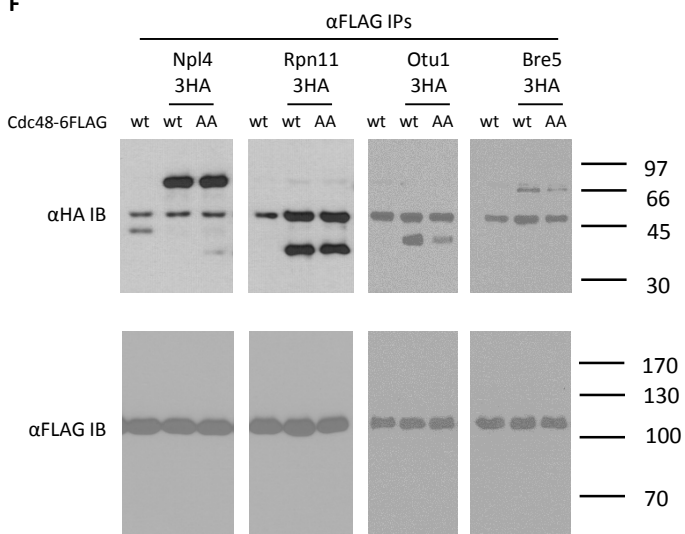**G**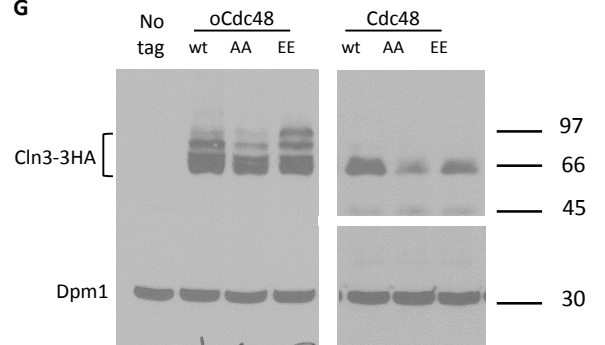

Supplement: EMBJ-37-e98724-s006.pdf [file EMBJ-37-e98724-s006.pdf]
